# Supplementary material
Source: PubMed Central journal article supplement (PMC7168784)
Supplement: Supplemental_Material6.pdf [file Supplemental_Material6.pdf]

## Supplementary tables

**Table S1.** Definition and units of compartments and rate constants.

| Abbreviation    | Definition                                                                     | Unit                                      |
|-----------------|--------------------------------------------------------------------------------|-------------------------------------------|
| $C_a$           | Arterial plasma input                                                          |                                           |
| $C_T$           | $F + NS + S$                                                                   |                                           |
| $C_I$           | $F + NS$                                                                       |                                           |
| $C_2$           | $S$                                                                            | Bq • mL <sup>-1</sup> or molar            |
| $F$             | Free                                                                           |                                           |
| $NS$            | Nonspecific                                                                    |                                           |
| $S$             | Specific                                                                       |                                           |
| $K_1$           | Rate constant for transfer from arterial plasma to tissue<br>$K_1 = F \cdot E$ | mL • cm <sup>-3</sup> • min <sup>-1</sup> |
| $F$             | blood flow                                                                     | mL • cm <sup>-3</sup> • min <sup>-1</sup> |
| $E$             | unidirectional extraction fraction<br>$E = 1 - e^{-PS/F}$                      | unitless                                  |
| $P$             | permeability of the tracer across the capillary surface                        | cm • min <sup>-1</sup>                    |
| $S$             | capillary surface area / g of tissue                                           | cm <sup>2</sup> • g <sup>-1</sup>         |
| $k_2, k_3, k_4$ | Rate constants for transfer between compartments                               | min <sup>-1</sup>                         |

**Table S2.** Statistical comparison of the one- and two-tissue compartment models for analysis of [<sup>11</sup>C]osimertinib data.

|                     | AIC,<br>1TCM | AIC,<br>2TCM | F statistics | Preferred model |
|---------------------|--------------|--------------|--------------|-----------------|
| <u>Whole brain</u>  |              |              |              |                 |
| Subject 1           | -29          | -73          | p < 0.0001   | 2TCM            |
| Subject 2           | -8           | -45          | p < 0.0001   | 2TCM            |
| Subject 3           | -1           | -106         | p < 0.0001   | 2TCM            |
| Subject 4           | 25           | -116         | p < 0.0001   | 2TCM            |
| Subject 6           | 3            | -121         | p < 0.0001   | 2TCM            |
| Subject 7           | 11           | -84          | p < 0.0001   | 2TCM            |
| Subject 8           | 37           | -56          | p < 0.0001   | 2TCM            |
| <u>Gray matter</u>  |              |              |              |                 |
| Subject 1           | -17          | -80          | p < 0.0001   | 2TCM            |
| Subject 2           | 0            | -31          | p < 0.0001   | 2TCM            |
| Subject 3           | 13           | -69          | p < 0.0001   | 2TCM            |
| Subject 4           | 35           | -48          | p < 0.0001   | 2TCM            |
| Subject 6           | 16           | -48          | p < 0.0001   | 2TCM            |
| Subject 7           | 9            | -70          | p < 0.0001   | 2TCM            |
| Subject 8           | 38           | -73          | p < 0.0001   | 2TCM            |
| <u>White matter</u> |              |              |              |                 |
| Subject 1           | 96           | 101          | p > 0.05     | 1TCM            |
| Subject 2           | 105          | 110          | p > 0.05     | 1TCM            |
| Subject 3           | 101          | 106          | p > 0.05     | 1TCM            |
| Subject 4           | 91           | 93           | p > 0.05     | 1TCM            |
| Subject 6           | 100          | 108          | p > 0.05     | 1TCM            |
| Subject 7           | 99           | 101          | p > 0.05     | 1TCM            |
| Subject 8           | 115          | 118          | p > 0.05     | 1TCM            |

AIC, Akaike information criterion; 1TCM, one-tissue compartment model; 2TCM, two-tissue compartment model.

**Table S3.** Statistical comparison of a two-tissue compartment model with irreversible binding ( $k_4=0$ ) and the standard two-tissue compartment model for analysis of [ $^{11}\text{C}$ ]osimertinib data.

| Subject no         | AIC,<br>2TCM, irreversible | AIC,<br>2TCM | F statistics | Preferred model |
|--------------------|----------------------------|--------------|--------------|-----------------|
| <u>Whole brain</u> |                            |              |              |                 |
| Subject 1          | -41                        | -73          | P<0.0001     | 2TCM            |
| Subject 2          | -11                        | -45          | P<0.0001     | 2TCM            |
| Subject 3          | -24                        | -106         | P<0.0001     | 2TCM            |
| Subject 4          | 2                          | -116         | P<0.0001     | 2TCM            |
| Subject 6          | -18                        | -121         | P<0.0001     | 2TCM            |
| Subject 7          | -19                        | -84          | P<0.0001     | 2TCM            |
| Subject 8          | 3                          | -56          | P<0.0001     | 2TCM            |
| <u>Gray matter</u> |                            |              |              |                 |
| Subject 1          | -22                        | -80          | P<0.0001     | 2TCM            |
| Subject 2          | -1                         | -31          | P<0.0001     | 2TCM            |
| Subject 3          | 0                          | -69          | P<0.0001     | 2TCM            |
| Subject 4          | 23                         | -48          | P<0.0001     | 2TCM            |
| Subject 6          | 8                          | -48          | P<0.0001     | 2TCM            |
| Subject 7          | -10                        | -70          | P<0.0001     | 2TCM            |
| Subject 8          | 10                         | -73          | P<0.0001     | 2TCM            |

AIC, Akaike information criterion; 2TCM, irreversible, two-tissue compartment model with irreversible binding ( $k_4=0$ ); 2TCM, two-tissue compartment model for reversible binding.

Supplementary figures

One-tissue compartment model

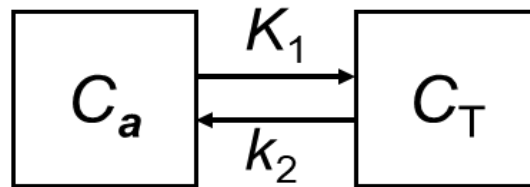

Two-tissue compartment model

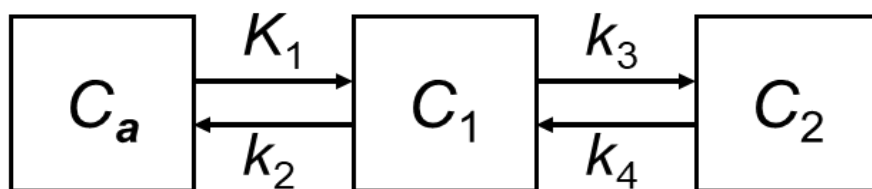

**Figure S1.** Representation of one-tissue and two-tissue compartment models. For definitions and units, see Table S1.

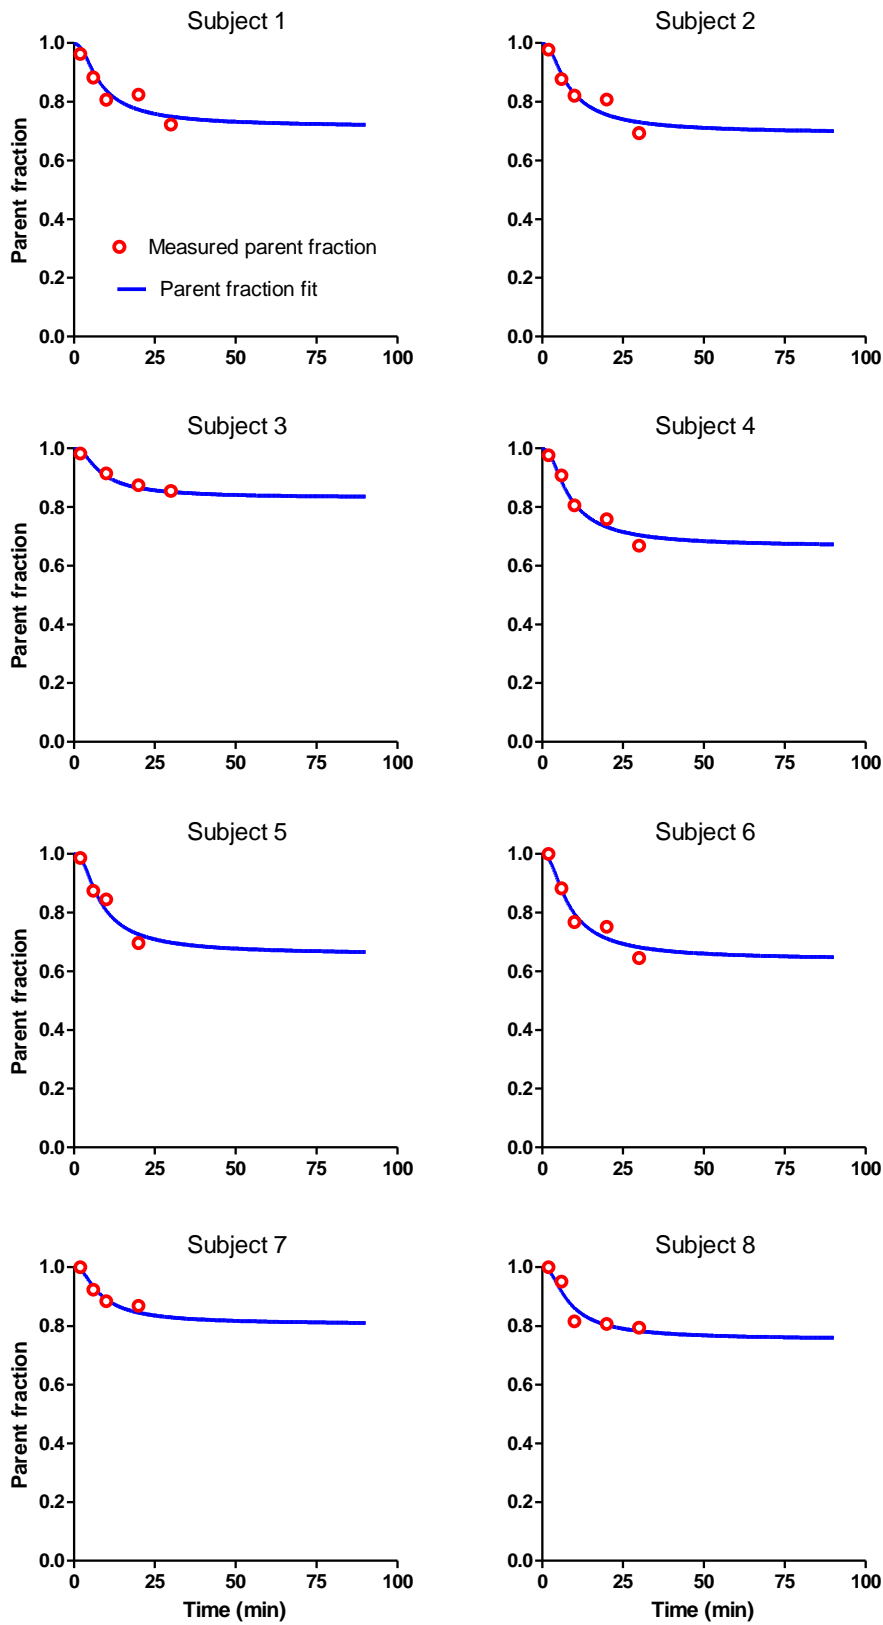

**Figure S2.** Population fit of the fraction of parent radioligand in plasma using Hills-Richard mixed model.
